# Supplementary material for: Bilayer Hydrogel Composed of Elastin-Mimetic Polypeptides as a Bio-Actuator with Bidirectional and Reversible Bending Behaviors
Source: MDPI journal article supplement (doi:10.3390/molecules28135274), 2023-07-07
Supplement: s1 [file s1]

# Bilayer Hydrogel Composed of Elastin-Mimetic Polypeptides as a Bio-Actuator with Bidirectional and Reversible Bending Behaviors

Rui Kamada <sup>1</sup>, Hiromitsu Miyazaki <sup>1</sup>, Jose Isagani B. Janairo <sup>2</sup>, Yoshiro Chuman <sup>3</sup> and Kazuyasu Sakaguchi <sup>1,\*</sup>

<sup>1</sup> Laboratory of Biological Chemistry, Department of Chemistry, Faculty of Science, Hokkaido University, Sapporo 060-0810, Japan; kamadar@sci.hokudai.ac.jp (R.K.)

<sup>2</sup> Department of Biology, College of Science, De La Salle University, Manila 0922, Philippines; jose.isagani.janairo@dlsu.edu.ph

<sup>3</sup> Laboratory of Biological Chemistry, Department of Chemistry, Faculty of Science, Niigata University, Niigata 950-2181, Japan; chuman@chem.sc.niigata-u.ac.jp

\* Correspondence: kazuyasu@sci.hokudai.ac.jp

## Contents:

Scheme S1. Synthesis of acryl-EMP.

Figure S1. Photographs of the EMP-NCE bilayer-hydrogel during cooling periods. After heating at 70°C, the hydrogel was incubated at 5°C for the indicated time periods.

Figure S2. SDS-PAGE analysis of purified EMP and (His)<sub>6</sub>-EMP.

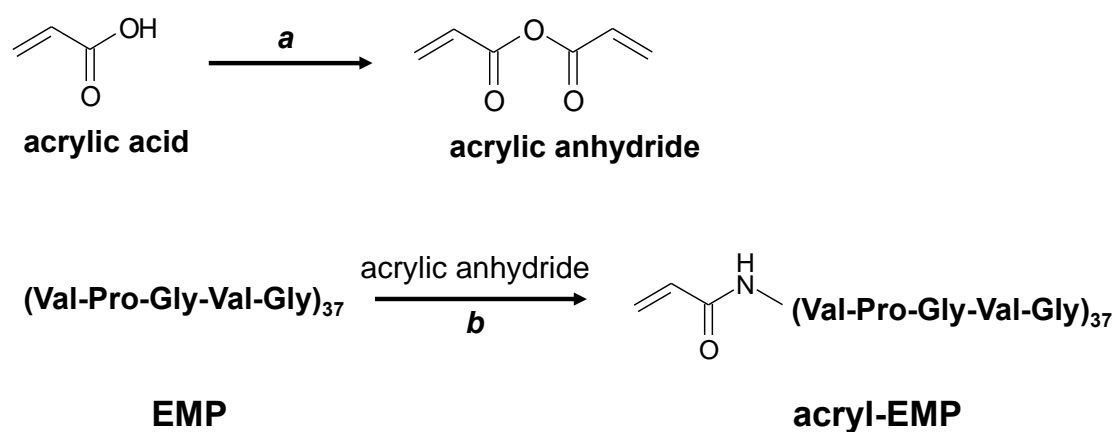

**Scheme S1.** Synthesis of acryl-EMP. Reagents and conditions: (a) 1-ethyl-3-(3-dimethylaminopropyl)carbodiimide hydrochloride (EDC), acetonitrile, rt for 6 h. (b) acetonitrile, rt for 2 h.

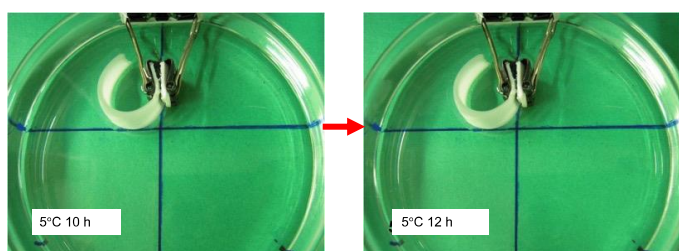

**Figure S1.** Photographs of the EMP-NCE bilayer-hydrogel during cooling periods. After heating at 70°C, the hydrogel was incubated at 5°C for the indicated time periods.

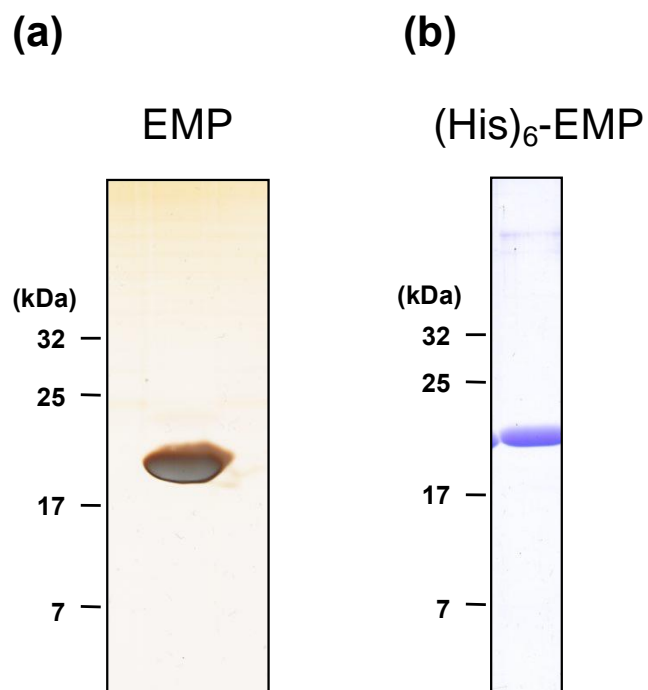

**Figure S2.** SDS-PAGE analysis of the purified EMP and (His)<sub>6</sub>-EMP. The gels were visualized by silver staining for EMP (a) or CBB-R250 staining for (His)<sub>6</sub>-EMP (b). The silver staining of SDS-PAGE showed that the EMP was highly purified.
